# Supplementary material
Source: PubMed Central journal article supplement (PMC6501540)
Supplement: 839503_Online_Appendix.pdf [file 839503_Online_Appendix.pdf]

## Appendix 1. Recruitment Platform Yield and User Characteristics

|                                                                                                              | CDN<br>Facebook | CDN<br>Twitter | CDN<br>Newsletter | TuDiabetes<br>Facebook | TuDiabetes<br>Twitter | TuDiabetes<br>Newsletter | TuDiabetes<br>Website | TuDiabetes<br>Instagram | Total |
|--------------------------------------------------------------------------------------------------------------|-----------------|----------------|-------------------|------------------------|-----------------------|--------------------------|-----------------------|-------------------------|-------|
| <b>New Users – number of first-time users of the landing page site</b>                                       |                 |                |                   |                        |                       |                          |                       |                         |       |
| Day 1                                                                                                        | 315             | 7              | 2                 | 0                      | 4                     | 5                        | 2                     | 2                       | 337   |
| Day 2                                                                                                        | 456             | 7              | 2                 | 1                      | 5                     | 11                       | 3                     | 2                       | 487   |
| Day 7                                                                                                        | 509             | 9              | 2                 | 1                      | 7                     | 11                       | 16                    | 3                       | 558   |
| Day 14                                                                                                       | 543             | 9              | 2                 | 2                      | 7                     | 11                       | 18                    | 4                       | 596   |
| <b>Sessions – number of unique periods of time in which a user is actively engaged with the landing page</b> |                 |                |                   |                        |                       |                          |                       |                         |       |
| Day 1                                                                                                        | 332             | 8              | 2                 | 0                      | 4                     | 7                        | 2                     | 2                       | 357   |
| Day 2                                                                                                        | 493             | 8              | 2                 | 1                      | 5                     | 14                       | 3                     | 2                       | 528   |
| Day 7                                                                                                        | 572             | 10             | 2                 | 1                      | 7                     | 16                       | 16                    | 3                       | 627   |
| Day 14                                                                                                       | 624             | 10             | 2                 | 2                      | 7                     | 16                       | 18                    | 4                       | 683   |
| <b>Page Views – number of times the landing page was viewed (repeated views are counted)</b>                 |                 |                |                   |                        |                       |                          |                       |                         |       |
| Day 1                                                                                                        | 356             | 8              | 2                 | 0                      | 4                     | 11                       | 2                     | 3                       | 386   |
| Day 2                                                                                                        | 524             | 8              | 3                 | 1                      | 5                     | 21                       | 3                     | 3                       | 568   |
| Day 7                                                                                                        | 614             | 10             | 3                 | 3                      | 7                     | 23                       | 16                    | 4                       | 680   |
| Day 14                                                                                                       | 677             | 10             | 3                 | 3                      | 7                     | 23                       | 18                    | 6                       | 747   |
| <b>Unique Page Views – number of sessions during which the landing page was viewed</b>                       |                 |                |                   |                        |                       |                          |                       |                         |       |
| Day 1                                                                                                        | 337             | 8              | 2                 | 0                      | 4                     | 8                        | 2                     | 3                       | 364   |
| Day 2                                                                                                        | 499             | 8              | 3                 | 1                      | 5                     | 16                       | 3                     | 3                       | 538   |
| Day 7                                                                                                        | 578             | 10             | 3                 | 2                      | 7                     | 18                       | 16                    | 4                       | 638   |
| Day 14                                                                                                       | 631             | 10             | 3                 | 3                      | 7                     | 18                       | 18                    | 5                       | 695   |
| <b>Proportion of new users from the United States or Canada</b>                                              |                 |                |                   |                        |                       |                          |                       |                         |       |
| Day 1                                                                                                        | 98.4%           | 100.0%         | 100.0%            | --                     | 100.0%                | 100.0%                   | 100.0%                | 100.0%                  | 98.5% |
| Day 2                                                                                                        | 98.0%           | 100.0%         | 100.0%            | 100.0%                 | 100.0%                | 100.0%                   | 100.0%                | 100.0%                  | 98.2% |
| Day 7                                                                                                        | 97.2%           | 100.0%         | 100.0%            | 100.0%                 | 100.0%                | 100.0%                   | 87.5%                 | 66.7%                   | 97.0% |
| Day 14                                                                                                       | 97.2%           | 100.0%         | 100.0%            | 50.0%                  | 100.0%                | 100.0%                   | 88.9%                 | 75.0%                   | 96.8% |
| <b>Proportion of new users accessing site via a mobile device or tablet</b>                                  |                 |                |                   |                        |                       |                          |                       |                         |       |
| Day 1                                                                                                        | 71.1%           | 71.4%          | 100.0%            | --                     | 50.0%                 | 60.0%                    | 50.0%                 | 100.0%                  | 70.9% |
| Day 2                                                                                                        | 73.5%           | 71.4%          | 100.0%            | 0.0%                   | 60.0%                 | 54.5%                    | 66.7%                 | 100.0%                  | 72.9% |
| Day 7                                                                                                        | 71.7%           | 66.7%          | 100.0%            | 0.0%                   | 71.4%                 | 54.5%                    | 50.0%                 | 100.0%                  | 70.8% |
| Day 14                                                                                                       | 70.9%           | 66.7%          | 100.0%            | 0.0%                   | 71.4%                 | 54.5%                    | 50.0%                 | 100.0%                  | 70.0% |

|                                                                         | <b>CDN<br/>Facebook</b> | <b>CDN<br/>Twitter</b> | <b>CDN<br/>Newsletter</b> | <b>TuDiabetes<br/>Facebook</b> | <b>TuDiabetes<br/>Twitter</b> | <b>TuDiabetes<br/>Newsletter</b> | <b>TuDiabetes<br/>Website</b> | <b>TuDiabetes<br/>Instagram</b> | <b>Total</b> |
|-------------------------------------------------------------------------|-------------------------|------------------------|---------------------------|--------------------------------|-------------------------------|----------------------------------|-------------------------------|---------------------------------|--------------|
| <b>Proportion of new users referred via social media</b>                |                         |                        |                           |                                |                               |                                  |                               |                                 |              |
| Day 1                                                                   | 68.3%                   | 57.1%                  | 0.0%                      | --                             | 100.0%                        | 0.0%                             | 0.0%                          | 50.0%                           | 66.5%        |
| Day 2                                                                   | 71.9%                   | 57.1%                  | 0.0%                      | 100.0%                         | 100.0%                        | 0.0%                             | 0.0%                          | 50.0%                           | 69.6%        |
| Day 7                                                                   | 68.4%                   | 55.6%                  | 0.0%                      | 100.0%                         | 85.7%                         | 0.0%                             | 0.0%                          | 33.3%                           | 64.7%        |
| Day 14                                                                  | 65.9%                   | 55.6%                  | 0.0%                      | 100.0%                         | 85.7%                         | 0.0%                             | 0.0%                          | 25.0%                           | 62.4%        |
|                                                                         |                         |                        |                           |                                |                               |                                  |                               |                                 |              |
| <b>Number of outbound link clicks from landing page into the survey</b> |                         |                        |                           |                                |                               |                                  |                               |                                 |              |
| Day 1                                                                   | 100                     | 2                      | 0                         | 0                              | 2                             | 0                                | 1                             | 0                               | 105          |
| Day 2                                                                   | 138                     | 2                      | 0                         | 0                              | 4                             | 1                                | 2                             | 0                               | 147          |
| Day 7                                                                   | 172                     | 2                      | 0                         | 0                              | 5                             | 1                                | 8                             | 0                               | 188          |
| Day 14                                                                  | 191                     | 2                      | 0                         | 0                              | 5                             | 1                                | 8                             | 1                               | 214          |

Data are from Google Analytics tracking of study web pages.

Days pertain to the number of days after the recruitment post was live and is cumulative (e.g., day 7 includes days 1 through 7).

CDN – College Diabetes Network.

## Appendix 2. Sample Representativeness

|                                           | Google Analytics <sup>a</sup> | Valid Cases <sup>b</sup> | CDN Sample <sup>c</sup> | p-value vs GA <sup>d</sup> | p-value vs CDN <sup>e</sup> |
|-------------------------------------------|-------------------------------|--------------------------|-------------------------|----------------------------|-----------------------------|
| <b>Total N</b>                            | 596                           | 138                      | 317                     |                            |                             |
| <b><u>Sociodemographics</u></b>           |                               |                          |                         |                            |                             |
| <b>Age (years)</b>                        |                               |                          |                         |                            | <0.0001                     |
| Mean (SD)                                 |                               | 20.49 (1.53)             | 22.48 (2.33)            |                            |                             |
| <b>Age Categories</b>                     |                               |                          |                         | <0.0001                    |                             |
| 17-24 years                               | 44.8%                         | 100.0%                   |                         |                            |                             |
| 25-34 years                               | 13.3%                         | 0.0%                     |                         |                            |                             |
| 35-44 years                               | 19.9%                         | 0.0%                     |                         |                            |                             |
| 45-54 years                               | 22.1%                         | 0.0%                     |                         |                            |                             |
| <b>Sex</b>                                |                               |                          |                         | 0.1292                     |                             |
| Male                                      | 14.4%                         | 19.6%                    |                         |                            |                             |
| Female                                    | 85.6%                         | 80.4%                    |                         |                            |                             |
| <b>Year in School</b>                     |                               |                          |                         |                            | 0.0146                      |
| Freshman                                  |                               | 13.8%                    | 25.2%                   |                            |                             |
| Sophomore                                 |                               | 30.4%                    | 25.6%                   |                            |                             |
| Junior                                    |                               | 30.4%                    | 26.8%                   |                            |                             |
| Senior                                    |                               | 15.2%                    | 24.6%                   |                            |                             |
| 5 <sup>th</sup> year or grad student      |                               | 10.1%                    | 14.5%                   |                            |                             |
| <b>Region of College</b>                  |                               |                          |                         | 0.1795                     | 0.1135                      |
| US, Northeast                             | 94.3%                         | 27.5%                    | 33.1%                   |                            |                             |
| US, Midwest                               |                               | 25.4%                    | 32.8%                   |                            |                             |
| US, South                                 |                               | 37.0%                    | 35.3%                   |                            |                             |
| US, West                                  |                               | 7.2%                     | 14.2%                   |                            |                             |
| Outside US                                | 5.7%                          | 2.9%                     | 1.6%                    |                            |                             |
| <b><u>Recruitment Source</u></b>          |                               |                          |                         |                            |                             |
| <b><u>Sampling Frame</u> <sup>f</sup></b> |                               |                          |                         |                            |                             |
| CDN                                       | 93.0%                         | 63.0%                    |                         | <0.0001                    |                             |
| TuDiabetes                                | 7.0%                          | 9.4%                     |                         | 0.3400                     |                             |
| Other source                              |                               | 30.4%                    |                         |                            |                             |
| <b><u>Platform</u> <sup>f</sup></b>       |                               |                          |                         |                            |                             |
| CDN Facebook                              | 91.1%                         | 35.5%                    |                         | <0.0001                    |                             |
| CDN Twitter                               | 1.5%                          | 2.9%                     |                         | 0.2651                     |                             |
| TuDiabetes Facebook                       | 0.3%                          | 5.8%                     |                         | <0.0001                    |                             |
| TuDiabetes Twitter                        | 1.2%                          | 0.0%                     |                         | 0.2008                     |                             |
| TuDiabetes Instagram                      | 0.7%                          | 0.0%                     |                         | 0.3345                     |                             |
| CDN Newsletter                            | 0.3%                          | 26.8%                    |                         | <0.0001                    |                             |
| TuDiabetes Newsletter                     | 1.8%                          | 0.7%                     |                         | 0.3494                     |                             |
| TuDiabetes Website                        | 3.0%                          | 2.2%                     |                         | 0.5910                     |                             |

<sup>a</sup> Total N for Google Analytics is among all new users at day 14 from whom data was available

<sup>b</sup> Total N for Valid Cases is among the final sample of cases included in the dataset

<sup>c</sup> Total N for CDN Sample is among 317 respondents to a survey conducted by the College Diabetes Network in 2017 (see Saylor et al. 2018)

<sup>d</sup> 'p-value vs GA' refers to the comparison of valid cases against user statistics derived from Google Analytics.

<sup>e</sup> ‘p-value vs CDN’ refers to the comparison of valid cases against CDN network member statistics.

<sup>f</sup> Sampling frame
